# Supplementary material for: Properties and mechanism for selective adsorption of Au(iii) on an ionic liquid adsorbent by graftingN-methyl imidazole onto chloromethylated polystyrene beads
Source: Royal Society of Chemistry journal article supplement (doi:10.1039/d0ra03504a), 2020-01-01
Supplement: d0ra03504a1.pdf [file d0ra03504a1.pdf]

# **Properties and mechanism for selective adsorption of Au (III) on an ionic liquid adsorbent by grafting N-methyl imidazole onto chloromethylated polystyrene beads**

Xin Kou, Bowen Ma, Rui Zhang, Miaomiao Cai, Yong Huang, Ying Yang\*

The Key Laboratory of Nonferrous Metals Chemistry and Resources Utilization of Gansu Province; School of Chemistry and Chemical Engineering, Lanzhou University, Lanzhou 730000, P. R. China

Au(III), ionic liquid functionalization, selectivity, d- $\pi$  interaction

The elemental analysis of the CMPS-IL was shown in **Table S1**. The grafting rate of N-methyl imidazole can be deduced from the nitrogen and carbon contents of the CMPS-IL. It was calculated by using equation (1):

$$\text{grafting rate} = \frac{27N}{7C - 12N} \% \quad (1)$$

**Table S1** The elemental analysis of CMPS-IL

|         |     | N(%) | C(%)  | H(%)  | grafting rate(%) |
|---------|-----|------|-------|-------|------------------|
| CMPS-IL | 1-1 | 9.38 | 62.64 | 5.384 | 77.6             |
|         | 1-2 | 9.36 | 62.59 | 5.374 |                  |

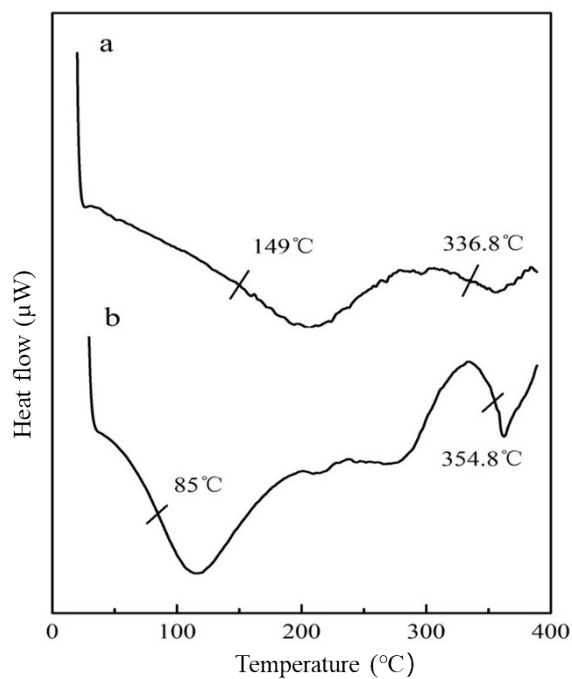

**Fig. S1** DSC curves of (a) CMPS;(b) CMPS-IL

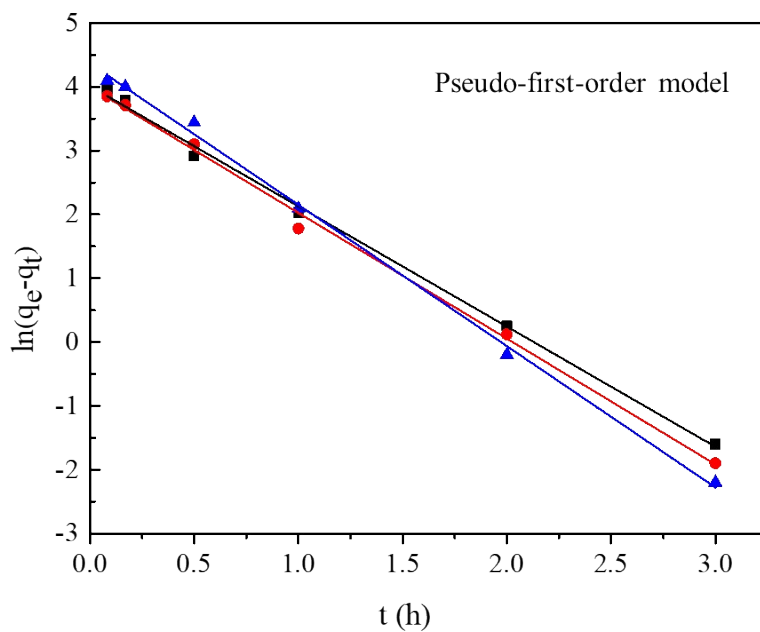

**Fig. S2** Pseudo first-order model of CMPS-IL for Au(III) at different temperatures(■ for 298K; ● for 308K; ▲ for 318K)

**Table S2.** Kinetic parameters obtained from pseudo-first- and -second-order models of CMPS-IL for Au(III) at different temperatures

| T(K) | $q_{e,exp}$ (mg g <sup>-1</sup> ) | Pseudo-first-order model          |                          |                | Pseudo-second-order model         |                                             |                |
|------|-----------------------------------|-----------------------------------|--------------------------|----------------|-----------------------------------|---------------------------------------------|----------------|
|      |                                   | $q_{e,cal}$ (mg g <sup>-1</sup> ) | $k_1$ (h <sup>-1</sup> ) | R <sup>2</sup> | $q_{e,cal}$ (mg g <sup>-1</sup> ) | $k_2$ (g mg <sup>-1</sup> h <sup>-1</sup> ) | R <sup>2</sup> |
| 298  | 58.71                             | 52.14                             | 2.149                    | 0.998          | 64.52                             | 0.058                                       | 0.999          |
| 308  | 60.92                             | 47.38                             | 2.018                    | 0.976          | 66.27                             | 0.064                                       | 0.999          |
| 318  | 65.98                             | 57.77                             | 2.367                    | 0.986          | 71.33                             | 0.064                                       | 0.999          |

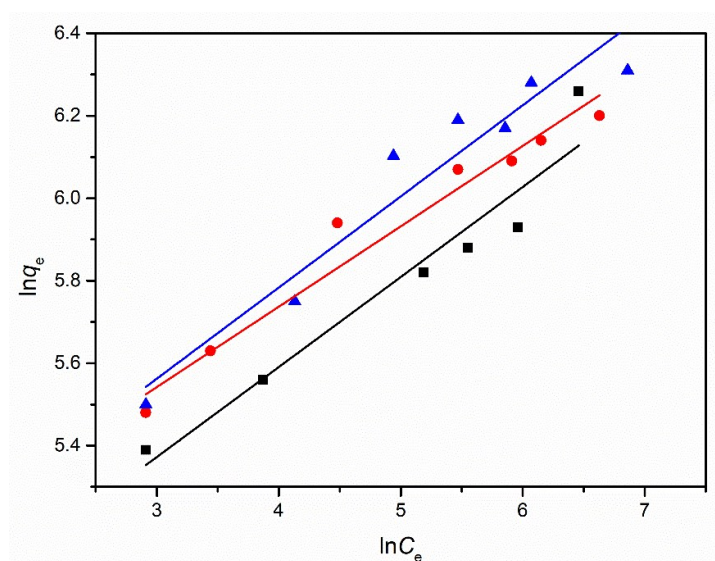

**Fig. S3** Freundlich model of CMPS-IL for Au(III) at different temperatures (■ for 298K; ● for 308K; ▲ for 318K)

**Table S3.** Adsorption isotherm parameter values obtained for Langmuir and Freundlich isotherm models, and thermodynamic parameters for Au(III) adsorption on CMPS-IL at different temperatures

| T(K) | $q_{m,exp}$ (mg g <sup>-1</sup> ) | Langmuir isotherm model |                                   |                | Freundlich isotherm model |        |                | Thermodynamic                      |                                    |                                                   |
|------|-----------------------------------|-------------------------|-----------------------------------|----------------|---------------------------|--------|----------------|------------------------------------|------------------------------------|---------------------------------------------------|
|      |                                   | b (L mg <sup>-1</sup> ) | $q_{m,cal}$ (mg g <sup>-1</sup> ) | R <sup>2</sup> | $K_f$                     | 1/n    | R <sup>2</sup> | $\Delta G$ (kJ mol <sup>-1</sup> ) | $\Delta H$ (kJ mol <sup>-1</sup> ) | $\Delta S$ (J mol <sup>-1</sup> K <sup>-1</sup> ) |
| 298  | 410.9                             | 0.01636                 | 416.7                             | 0.994          | 60.79                     | 0.2721 | 0.949          | -0.002                             |                                    |                                                   |
| 308  | 475.0                             | 0.02609                 | 476.2                             | 0.996          | 84.51                     | 0.2538 | 0.897          | -1.239                             | 36.88                              | 123.7                                             |
| 318  | 516.5                             | 0.03433                 | 520.8                             | 0.998          | 75.17                     | 0.2917 | 0.894          | -2.476                             |                                    |                                                   |

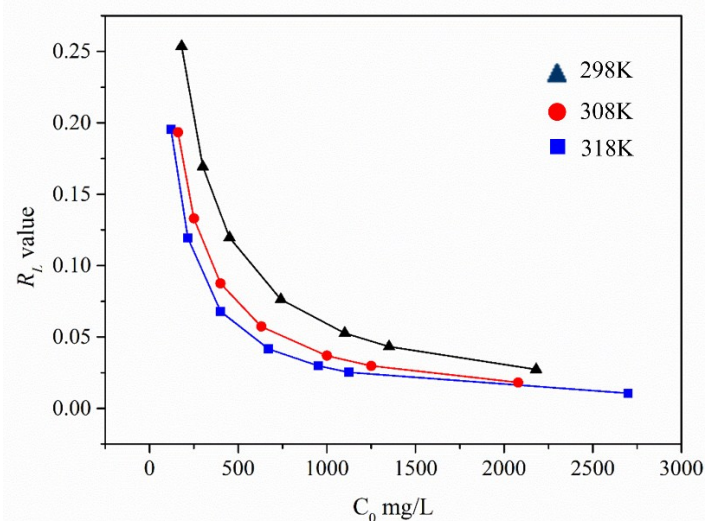

**Fig. S4** Effect of temperature and initial Au(III) concentration on the separation factor ( $R_L$ ).

**Table S4.** Selectivity coefficient ( $\beta_{Au/M}$ ) data and extraction efficiency ( $E_{Au}$ ) data towards different ions.

| M               | $\beta_{Au/M}$     | $E_{Au}$ (%) |
|-----------------|--------------------|--------------|
| Au(III)-Fe(III) | $1.76 \times 10^5$ | 98.8         |
| Au(III)-Cu(II)  | $1.57 \times 10^5$ | 96.1         |
| Au(III)-Co(II)  | $1.17 \times 10^6$ | 96.3         |
| Au(III)-Ni(II)  | $2.62 \times 10^4$ | 95.7         |
| Au(III)-Cd(II)  | $2.83 \times 10^4$ | 96.7         |

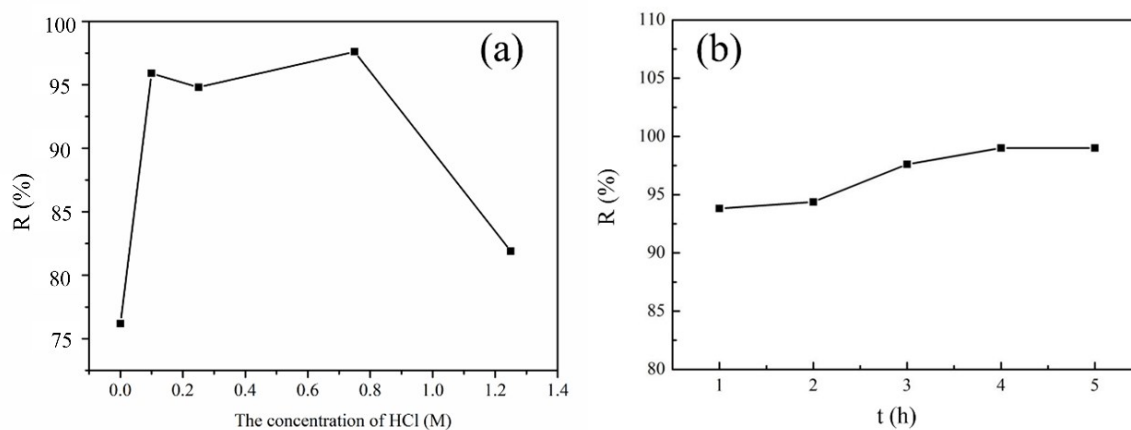

**Fig. S4** (a) Recovery of Au(III) with HCl of different molarities in 0.25 M thiourea (at 298 K for 3 h); (b) Effect of time on desorption efficiency (40 mg of Au(III) saturated CMPS-IL, 50mL of the mixture of HCl-thiourea with molar ratio=3:1, 298K)
